# Supplementary material for: Phylogeny, time divergence, and historical biogeography of the South American Liolaemus alticolor-bibronii group (Iguania: Liolaemidae)
Source: PeerJ journal article supplement (doi:10.7717/peerj.4404), 2018-02-20

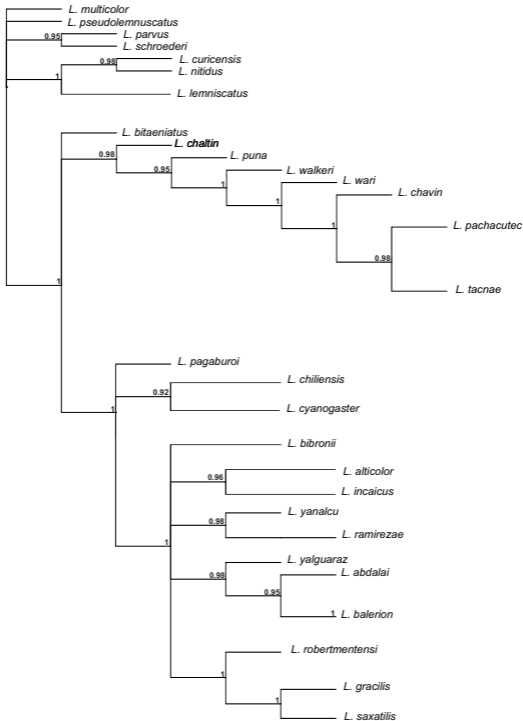

Supplement: Supplemental_File_S5.pdf [file Supplemental_File_S5.pdf]
