# Supplementary material for: Phylogeny, time divergence, and historical biogeography of the South American Liolaemus alticolor-bibronii group (Iguania: Liolaemidae)
Source: PeerJ journal article supplement (doi:10.7717/peerj.4404), 2018-02-20

## Supplemental File S3

Trees of DEC analysis found with the constrained adjacency matrix.

S3.1. Tree found with dispersal cost Matrix I

S3.2 Tree found with dispersal cost Matrix II

S3.3 Tree found with dispersal cost Matrix III

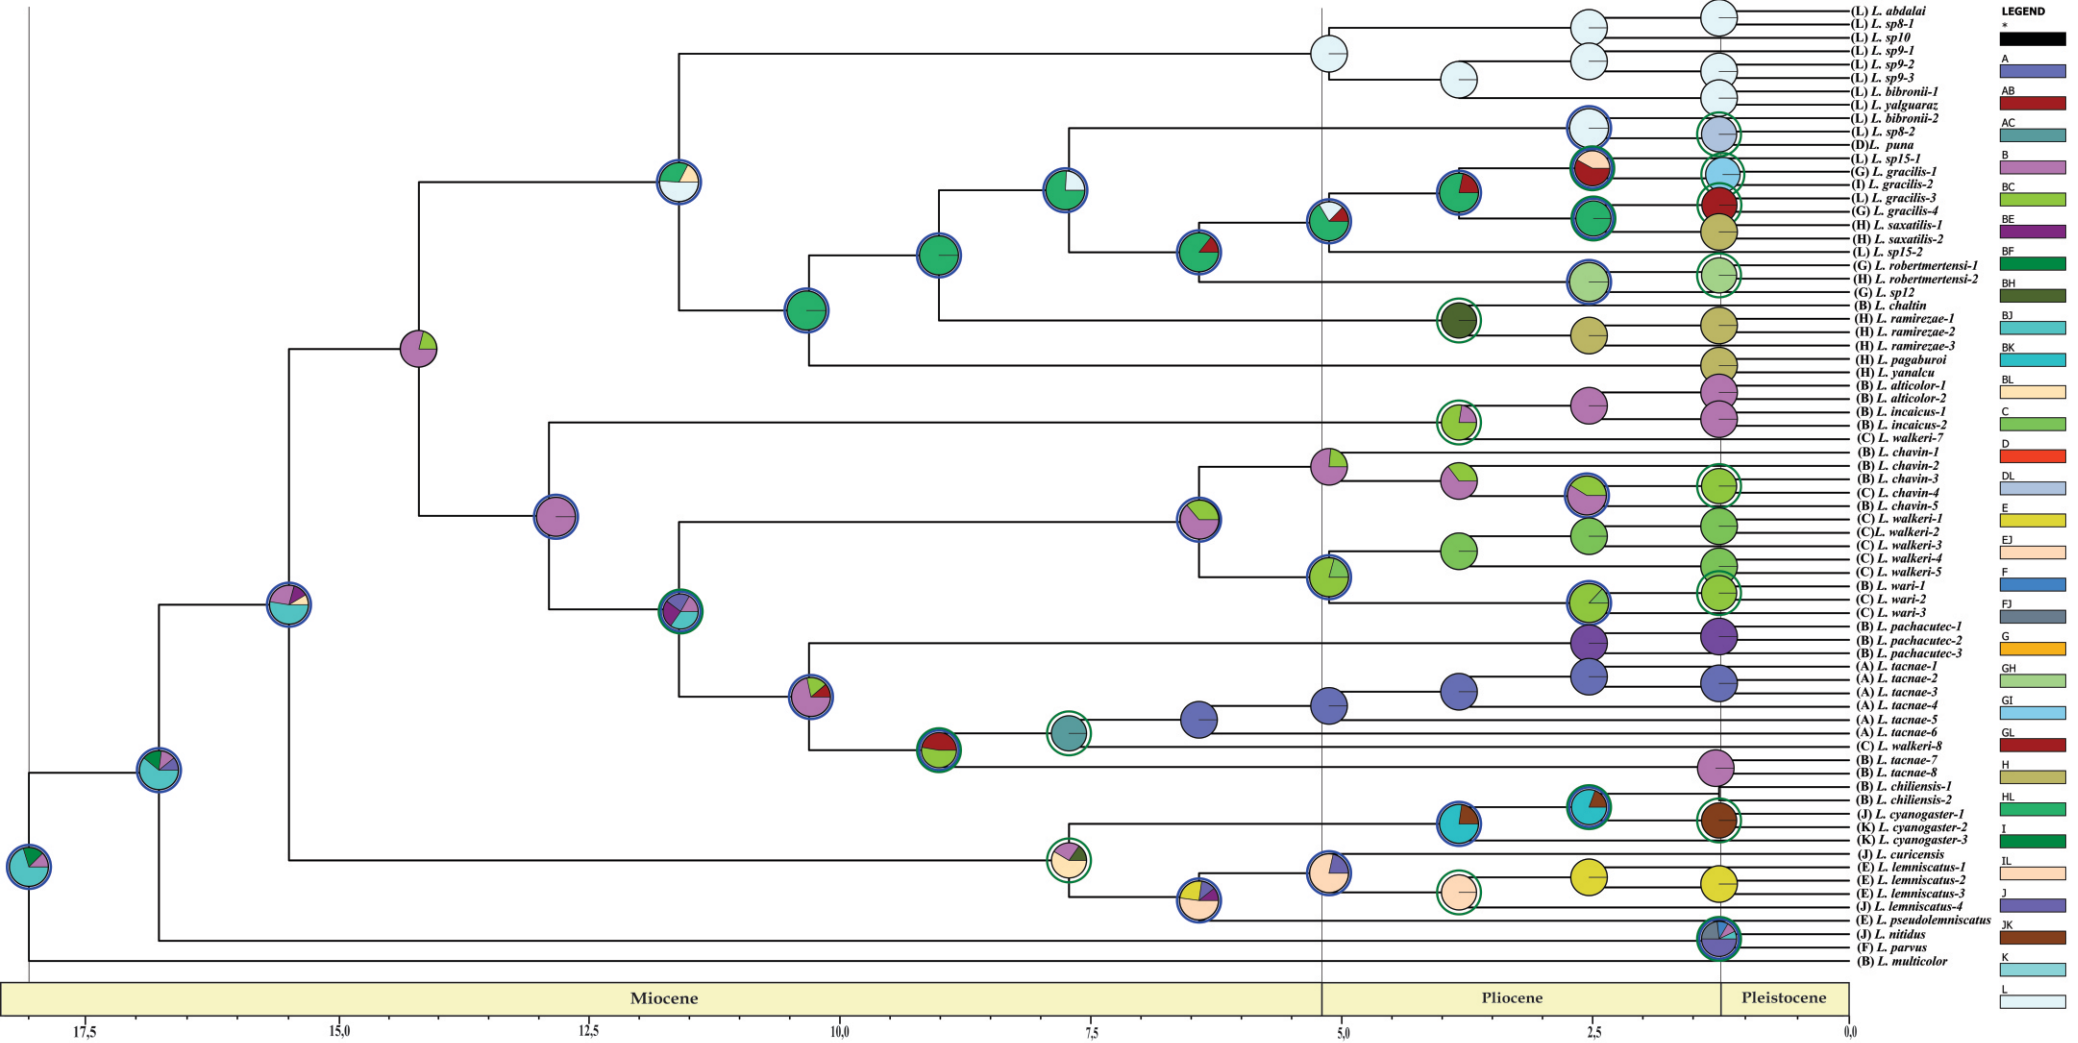

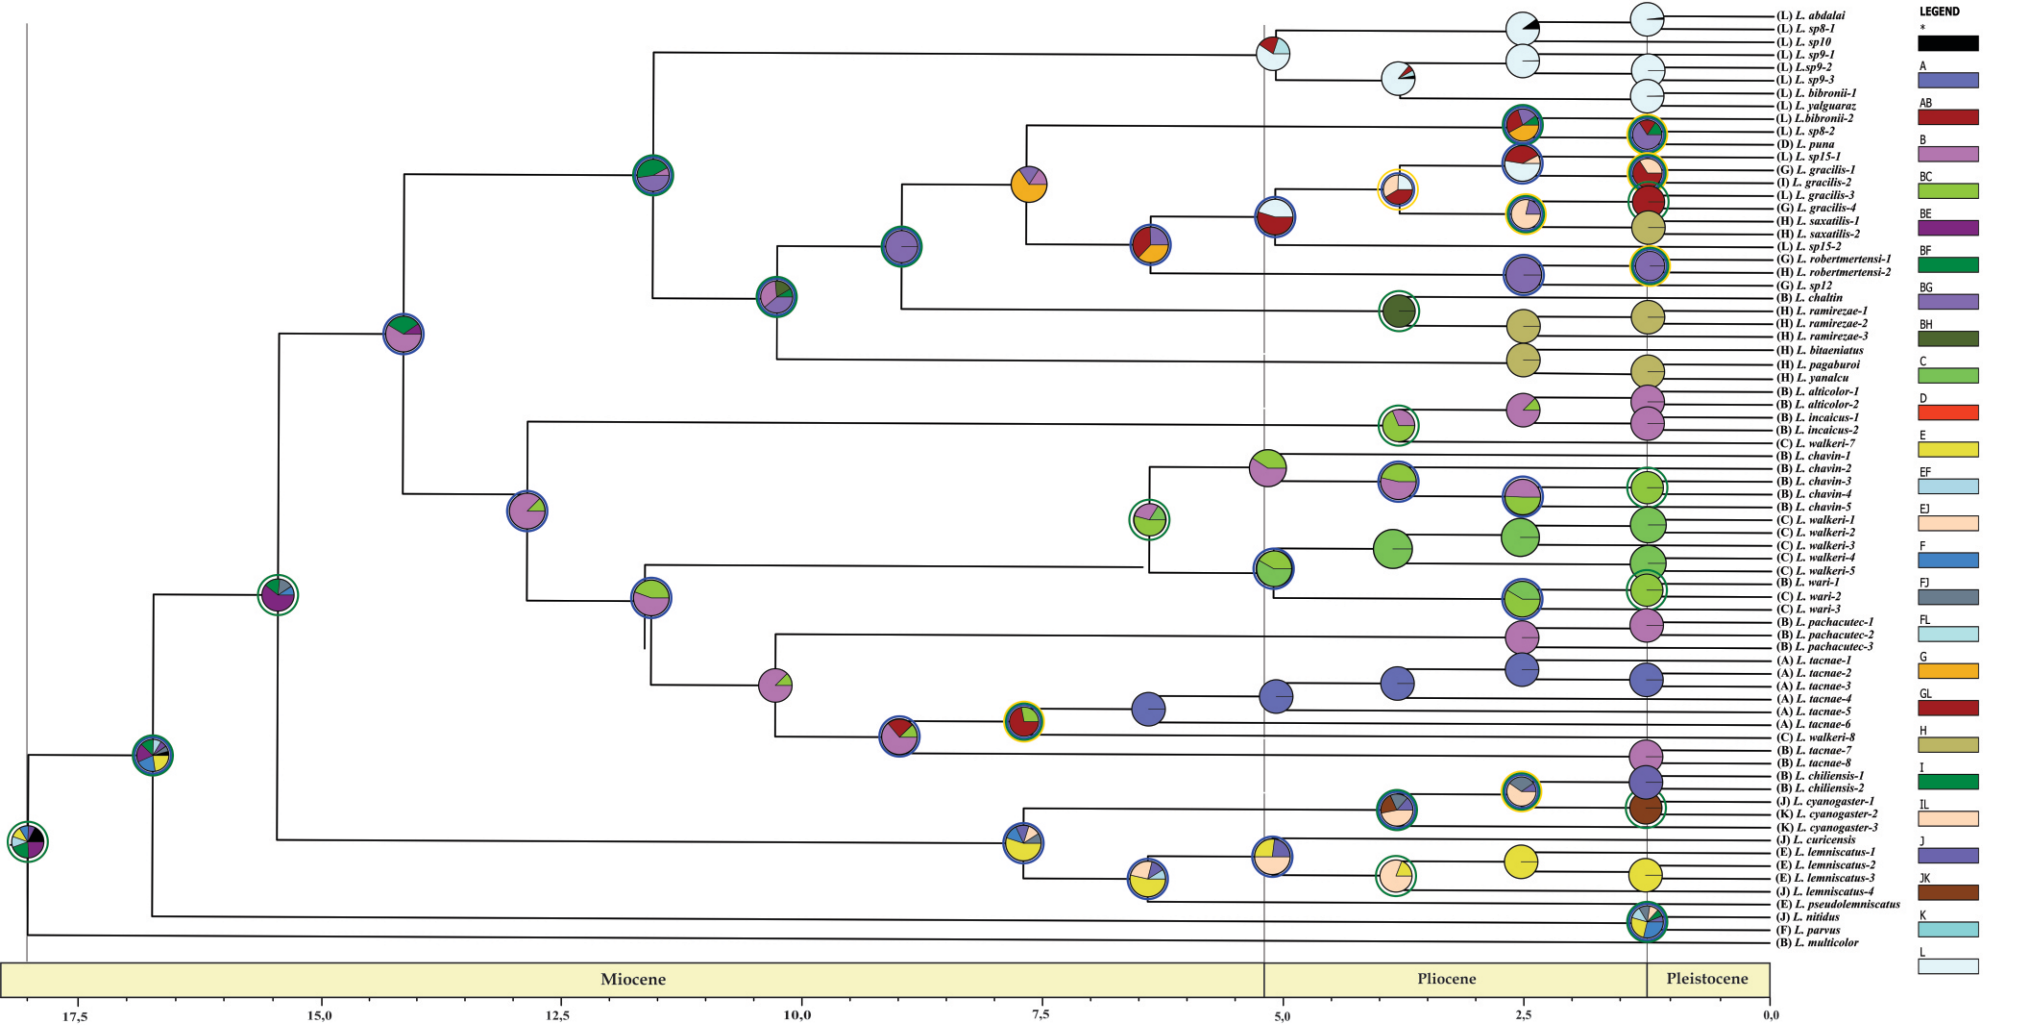

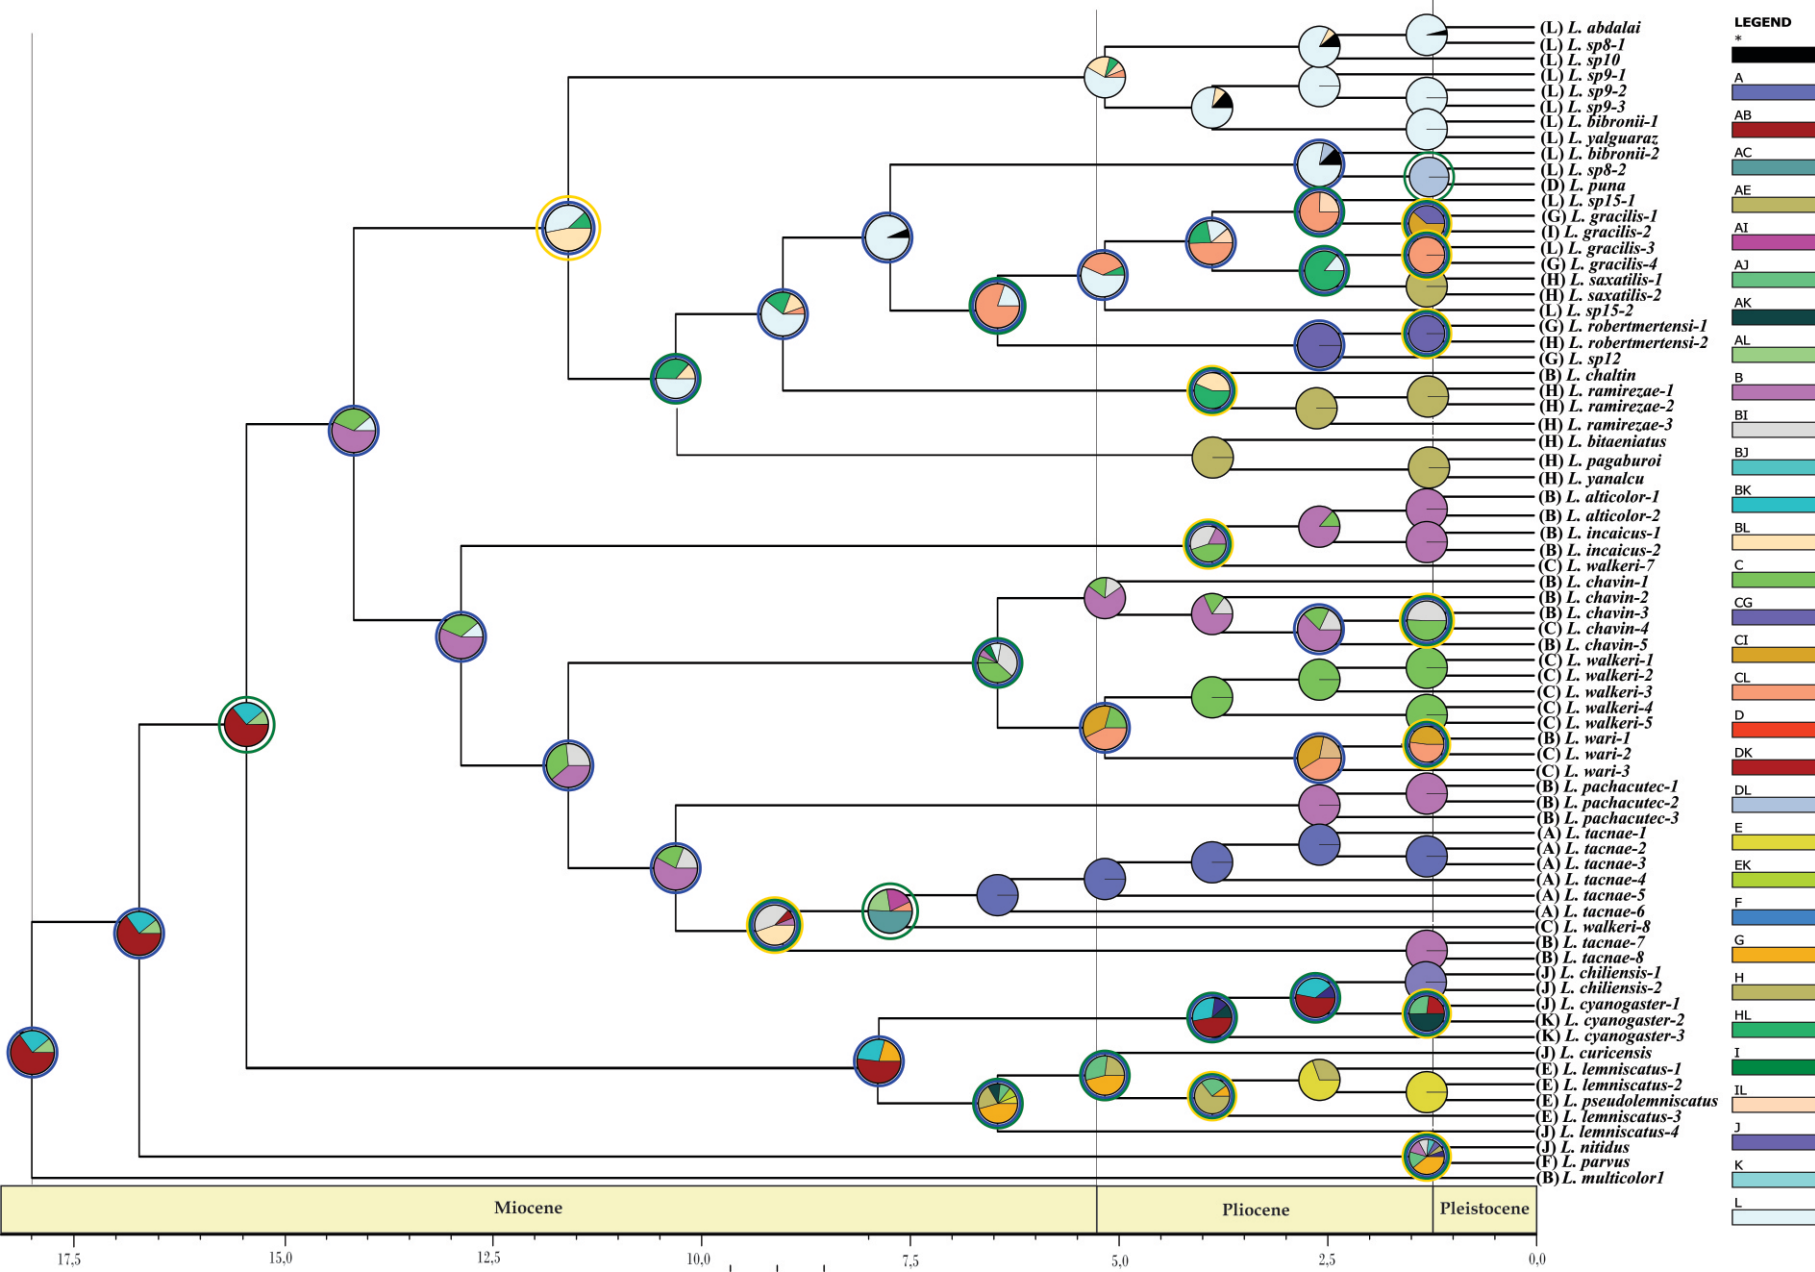

Supplement: Supplemental_Files_S3.pdf [file Supplemental_Files_S3.pdf]
